# Supplementary material for: Permeabilization-free en bloc immunohistochemistry for correlative microscopy
Source: PubMed Central journal article supplement (PMC8118656; doi:10.7554/elife.63392), 2021-05-13
Supplement: elife-63392-supp1.pdf [file elife-63392-supp1.pdf]

# Supplementary File 1

| <u>Solution</u>                              | <u>Duration</u> | <u>Temp.</u> |                                    | <u>Relevant Supplemental Figures</u>                                                                                                      |
|----------------------------------------------|-----------------|--------------|------------------------------------|-------------------------------------------------------------------------------------------------------------------------------------------|
| ACSF                                         | ~10 min         | 4° C         | Dissection,<br>acute sectioning    |                                                                                                                                           |
|                                              |                 |              | ↓                                  |                                                                                                                                           |
| 4% PFA + 0.005% GA<br>in 0.175 M PB*, pH 7.4 | 4 - 16 hr       | 4° C         | First fixation                     | Figure 1-figure supplement 2 - Optimization of fixation parameters<br>Figure 1-figure supplement 3 - Optimal duration of primary fixation |
|                                              |                 |              | ↓                                  |                                                                                                                                           |
| 0.05 M glycine in<br>0.175 M PB, pH 7.4      | o/n             | RT           | Glycine rinse                      |                                                                                                                                           |
|                                              |                 |              | ↓                                  |                                                                                                                                           |
| 0.175 M PB, pH 7.4                           | 4 hr            | RT           | Rinse                              |                                                                                                                                           |
|                                              |                 |              | ↓                                  |                                                                                                                                           |
| 0.17 M NaCl +<br>0.01 M PB + 1° Ab           | 2 - 7 days      | RT           | Primary antibody                   | Figure 1-figure supplement 4 - Effect of serum blocking<br>Figure 1-figure supplement 7 - Antibodies tested                               |
|                                              |                 |              | ↓                                  |                                                                                                                                           |
| 0.175 M PB, pH 7.4                           | o/n             | RT           | Rinse                              |                                                                                                                                           |
|                                              |                 |              | ↓                                  |                                                                                                                                           |
| 0.17 M NaCl +<br>0.01 M PB + 2° Ab           | 2 - 7 days      | RT           | Secondary antibody                 | Figure 1-figure supplement 5 - Effect of prolonged antibody incubation                                                                    |
|                                              |                 |              | ↓                                  |                                                                                                                                           |
| 0.175 M PB, pH 7.4                           | 4 hr - o/n      | RT           | Rinse                              |                                                                                                                                           |
|                                              |                 |              | ↓                                  |                                                                                                                                           |
| 2% PFA in 0.175 M PB,<br>pH 7.4              | 2 hr            | RT           | Second fixation                    |                                                                                                                                           |
|                                              |                 |              | ↓                                  |                                                                                                                                           |
| 0.05 M glycine in<br>0.175 M PB, pH 7.4      | 4 hr            | RT           | Glycine rinse                      |                                                                                                                                           |
|                                              |                 |              | ↓                                  |                                                                                                                                           |
| 0.175 M PB, pH 7.4                           | 4 hr            | RT           | Rinse                              |                                                                                                                                           |
|                                              |                 |              | ↓                                  |                                                                                                                                           |
| 20 → 100% fructose                           | 20 - 48 hr      | RT           | SeeDB refractive index<br>matching | Figure 1-figure supplement 6- Effect of SeeDB clearing                                                                                    |
|                                              |                 |              | ↓                                  |                                                                                                                                           |
| 100% wt/vol or<br>80.2% wt/wt fructose       | < 1 day         | RT           | 2P imaging & NIRB                  |                                                                                                                                           |
|                                              |                 |              | ↓                                  |                                                                                                                                           |
| 0.175 M PB, pH 7.4                           | 12 hr           | RT           | Return tissue to PB                |                                                                                                                                           |
|                                              |                 |              | ↓                                  |                                                                                                                                           |
| 0.15 M CB, pH 7.4                            | 2 hr            | 4° C         | Rinse                              |                                                                                                                                           |
|                                              |                 |              | ↓                                  |                                                                                                                                           |
| 2% GA in 0.15 M CB,<br>pH 7.4                | 2 hr            | 4° C         | Third fixation                     |                                                                                                                                           |
|                                              |                 |              | ↓                                  |                                                                                                                                           |
| 0.15 M CB, pH 7.4                            | o/n             | 4° C         | Rinse                              |                                                                                                                                           |
|                                              |                 |              | ↓                                  |                                                                                                                                           |
|                                              | 2 days          |              | EM staining/embedding              |                                                                                                                                           |
|                                              |                 |              | ↓                                  |                                                                                                                                           |
|                                              |                 |              | EM imaging                         |                                                                                                                                           |
