# Supplementary material for: Permeabilization-free en bloc immunohistochemistry for correlative microscopy
Source: eLife journal article supplement (doi:10.7554/elife.63392), 2021-05-13
Supplement: fig1-data1 [file elife-63392-fig1-data1-v1.pdf]

| <b>Primary Antibody</b>                    | <b>Company and Cat #</b>      | <b>Stock Concentration</b> | <b>Concentration</b> | <b>Target</b>           |
|--------------------------------------------|-------------------------------|----------------------------|----------------------|-------------------------|
| Anti-calbindin (CB)                        | Synaptic Systems<br>214 005   | 1 mg/mL                    | 1:100                | Calcium binding protein |
| Anti-calretinin (CR)                       | Sigma<br>C7479                | 0.8 mg/mL                  | 1:50                 | Calcium binding protein |
| Anti-tyrosine hydroxylase (TH)             | EMD Millipore<br>MAB318-AF488 | 0.5 mg/mL                  | 1:100                | Enzyme                  |
| Anti-choline acetyltransferase (ChAt)      | EMD Millipore<br>AB144P       | 0.5 mg/mL                  | 1:100                | Enzyme                  |
| Anti-synaptophysin (Syn) (Alexa Fluor-594) | Abcam<br>ab206868             | 0.5 mg/mL                  | 1:50                 | Presynaptic protein     |
| Anti-synaptophysin (Syn) (Alexa Fluor-488) | Abcam<br>ab196379             | 0.5 mg/mL                  | 1:50                 | Presynaptic protein     |
| Anti-Homer 1                               | Synaptic Systems<br>160 003   | 1 mg/mL                    | 1:50                 | Postsynaptic protein    |
| Anti-NeuN                                  | Abcam<br>ab190195             | 0.5 mg/mL                  | 1:50                 | Neuronal marker         |
| Anti-GFP                                   | ThermoFisher<br>G10362        | 0.2 mg/mL                  | 1:50                 | Marker protein          |

| <b>Secondary Antibody</b>                                              | <b>Company and Cat #</b>                 | <b>Stock Concentration</b> | <b>Concentration</b> |
|------------------------------------------------------------------------|------------------------------------------|----------------------------|----------------------|
| Alexa Fluor 594 F(ab') <sub>2</sub> fragment donkey anti-rabbit        | Jackson<br>ImmunoResearch<br>711-586-152 | 1.5 mg/mL                  | 1:100                |
| DyLight 594 donkey anti-goat                                           | Abcam<br>ab96937                         | 0.5 mg/mL                  | 1:100                |
| DyLight 405 goat anti-guinea pig F(ab') <sub>2</sub> fragment specific | Jackson<br>ImmunoResearch<br>106-475-006 | 1.5 mg/mL                  | 1:25                 |
| HRP Donkey anti-rabbit                                                 | Abcam<br>ab205722                        | 2 mg/mL                    | 1:50                 |
